# Supplementary material
Source: PubMed Central journal article supplement (PMC10015596)
Supplement: NIHMS1874940-supplement-Supp.pdf [file NIHMS1874940-supplement-Supp.pdf]

**Appendix**  
**Use and Impact of Type 2 Diabetes Prevention Interventions**  
**Campione et al.**

**Appendix Figure 1.** Distribution of how criteria was met for eligibility (n=69,434; 31%) and those not eligible (n=154,783: 69%).

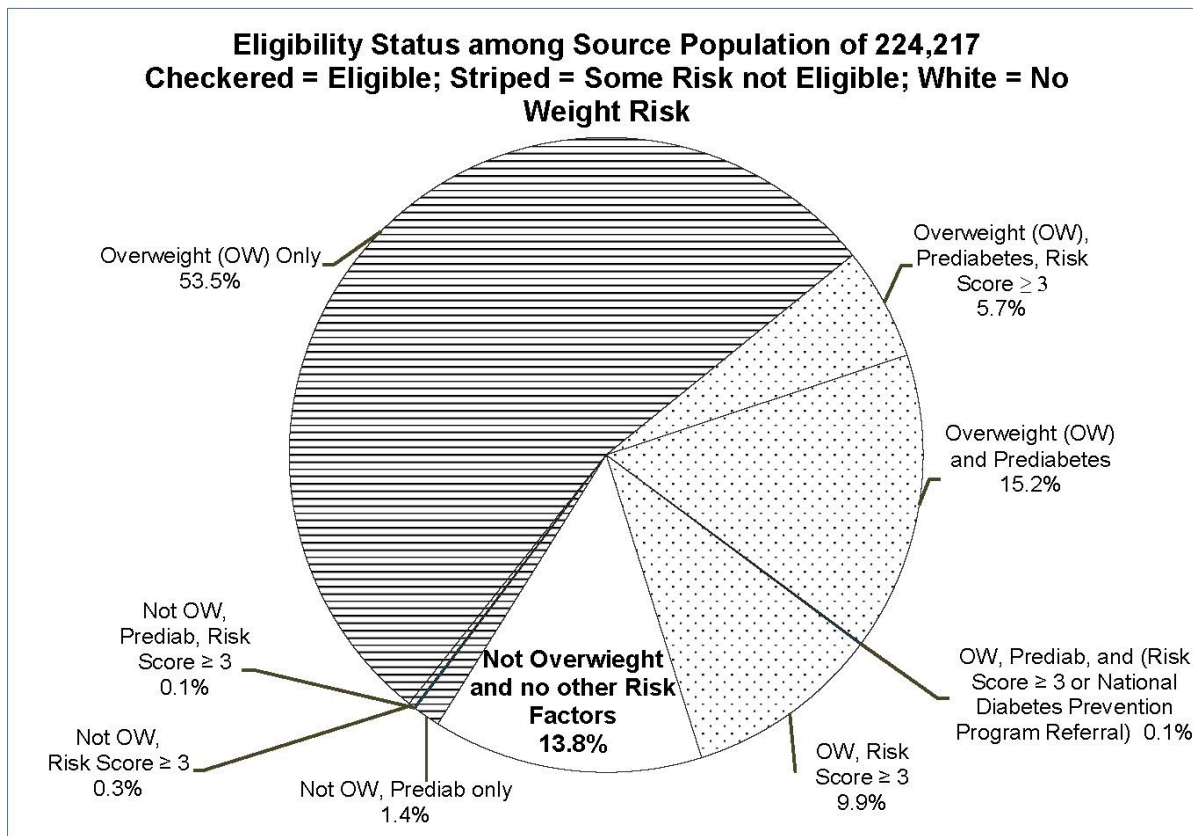

**Criteria for study inclusion (the dotted slices of the pie):**

- 1) **Overweight** defined as BMI  $\geq 25$  kg/m<sup>2</sup> for non-Asian persons and BMI  $\geq 23$  kg/m<sup>2</sup> for Asian persons (or BMI  $\geq 24$  kg/m<sup>2</sup> for non-Asian persons and BMI  $\geq 22$  kg/m<sup>2</sup> for Asian persons if prior to March 2018, when guidelines were updated), **and**
- 2) **at least one of the following:**
  - a. prediabetes (i.e., glycated hemoglobin 5.7%–6.4%, fasting plasma glucose 100–125 mg/dL, or a diagnosis code of prediabetes [ICD-9=790.2x or ICD-10=R73.03]),
  - b. previous gestational diabetes, or
  - c.  $\geq 3$  of the following risk factors (as a proxy for commonly-used prediabetes risk questionnaires): obesity (BMI  $\geq 30$  kg/m<sup>2</sup>), high blood pressure, family history of type 2 diabetes, male sex, or age  $\geq 50$  years.

**Appendix**  
**Use and Impact of Type 2 Diabetes Prevention Interventions**  
**Campione et al.**

**Appendix Figure 2.** Timeframe for before and after intervention for HbA1c and BMI change analysis.

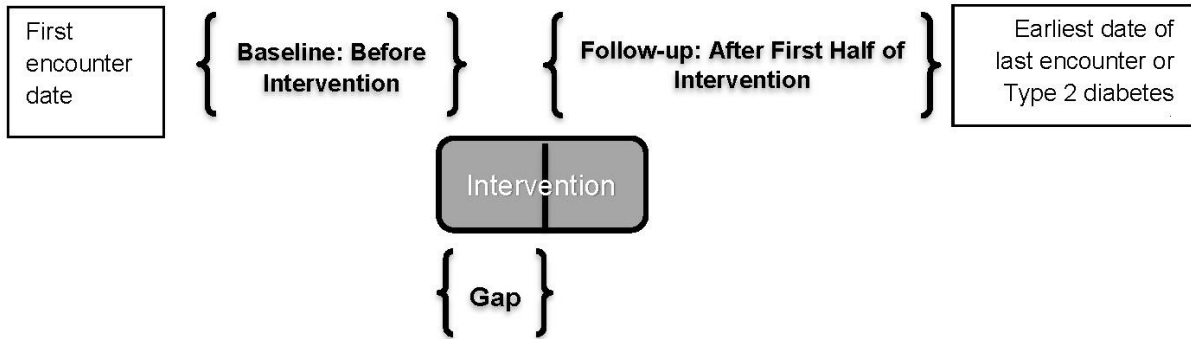

**Appendix**  
**Use and Impact of Type 2 Diabetes Prevention Interventions**  
**Campione et al.**

**Appendix Table 1.** Variable and Case Definitions

The Observational Medical Outcomes Partnership (OMOP) Common Data Model (CDM) v4 was used to standardize the disparate coding schemes present in EHRs, such as the ICD, National Drug Code, Current Procedural Terminology, and the Systematized Nomenclature of Medicine (SNOMED) Clinical Terms into a common vocabulary. The application of OMOP CDM terminologies, vocabularies, and coding schemes for the development of the LEADR allowed for the aggregation of disparate observational databases.

| Variable        | LEADR Definition                                                                                                                                                                                                                                                                                                                                                                                                                                                                                                                                                                                                                                                                                                                                                                                                                                                                                                                                                                                                                                                                                                                                                                                                                                                                                                                                                                                                                                     |
|-----------------|------------------------------------------------------------------------------------------------------------------------------------------------------------------------------------------------------------------------------------------------------------------------------------------------------------------------------------------------------------------------------------------------------------------------------------------------------------------------------------------------------------------------------------------------------------------------------------------------------------------------------------------------------------------------------------------------------------------------------------------------------------------------------------------------------------------------------------------------------------------------------------------------------------------------------------------------------------------------------------------------------------------------------------------------------------------------------------------------------------------------------------------------------------------------------------------------------------------------------------------------------------------------------------------------------------------------------------------------------------------------------------------------------------------------------------------------------|
| Type 2 diabetes | <p>1) A diabetes diagnosis of type 2 diabetes or unspecified diabetes diagnosis made on 2 different days within 24 months (i.e., to identify a new diabetes case 2 separate diagnosis records of diabetes were required that were at least 14 days apart)*, or</p> <p>2) A prescription for metformin or glucagon-like peptide-1 (GLP1) agonists and a Type2DM or unspecified diabetes diagnosis on any encounter (activities &lt;14 days apart), or</p> <p>3) A prescription for an antidiabetic agent (alpha-glucosidase inhibitors, amylin analogs, anti-diabetic agent combinations including those with metformin, insulin use among non-pregnant women, meglitinides, sodium glucose cotransporter 2 inhibitors, sulfonylureas, thiazolidinediones, dipeptidyl peptidase-4 inhibitors), or</p> <p>4) Hemoglobin A1c <math>\geq 6.5\%</math>, or</p> <p>5) Fasting plasma glucose <math>&gt;126</math> mg/dL, or</p> <p>6) Random blood glucose <math>&gt;250</math> mg/dL or</p> <p>7) Two random blood glucoses <math>\geq 200</math> mg/dL separated by <math>\geq 14</math> days</p> <p>* Mapped diagnosis codes to T2 or unspecified Diabetes OMOPs include:<br/>           ICD-9 Codes for type 2 diabetes (T2DM) or unspecified Diabetes or T2DM diabetes complications: 250.x0, 250.x2, 362.01–362.07, 357.2, 366.41, 648.0x.<br/>           ICD10 Codes for T2DM diabetes or complications: E11.x, O24.1x, O24.3x, O24.8x, O24.9x.</p> |
| Obesity         | BMI $\geq 30$ kg/m <sup>2</sup>                                                                                                                                                                                                                                                                                                                                                                                                                                                                                                                                                                                                                                                                                                                                                                                                                                                                                                                                                                                                                                                                                                                                                                                                                                                                                                                                                                                                                      |
| Prediabetes     | <p>1.) A prediabetes diagnosis (ICD-9=790.2X; ICD-10=R73.03), or</p> <p>2.) Lab results:</p> <p style="padding-left: 20px;">a) glycated hemoglobin (HbA1c) lab result <math>\geq 5.7\%</math> and <math>&lt;6.5\%</math> or</p> <p style="padding-left: 20px;">b) fasting plasma glucose <math>\geq 100</math> mg/dL and <math>&lt;126</math>mg/dL</p>                                                                                                                                                                                                                                                                                                                                                                                                                                                                                                                                                                                                                                                                                                                                                                                                                                                                                                                                                                                                                                                                                               |
| Hypertension    | <p>1. Two hypertension diagnoses (<math>\geq 14</math> days apart)</p> <p>2. A hypertension diagnosis and a hypertension medication prescription</p> <p style="padding-left: 20px;">a) angiotensin-converting enzyme inhibitors (ACE),</p> <p style="padding-left: 20px;">b) angiotensin II receptor blockers (ARB),</p> <p style="padding-left: 20px;">c) beta blockers,</p>                                                                                                                                                                                                                                                                                                                                                                                                                                                                                                                                                                                                                                                                                                                                                                                                                                                                                                                                                                                                                                                                        |

**Appendix**  
**Use and Impact of Type 2 Diabetes Prevention Interventions**  
**Campione et al.**

---

|                              |                                                                                                                                                                                                                                                                                                                                                                                                                         |
|------------------------------|-------------------------------------------------------------------------------------------------------------------------------------------------------------------------------------------------------------------------------------------------------------------------------------------------------------------------------------------------------------------------------------------------------------------------|
|                              | d) calcium channel blocks, and/or<br>e) diuretics<br>3. A hypertension diagnosis and<br>a) systolic blood pressure average >140 (if at least 2 results $\geq$ 14 days apart), or<br>b) diastolic blood pressure average >90 (if at least 2 results $\geq$ 14 days apart)                                                                                                                                                |
| Elevated lipids              | 1. An elevated lipids diagnosis, or<br>2. A prescription for elevated lipids medication: a) statins or statin combinations, b) fibrate, c) niacin, d) bile acid sequestrates, and/or e) other lipid-modifying agents, or<br>3. Lab results nearest the earliest record of prediabetes: a) triglyceride level $\geq$ 250 mg/dL, b) HDL <40 mg/dL for males and <50 mg/dL for females, c) non-HDL value $\geq$ 160 mg/dL. |
| Cardiovascular disease (CVD) | One or more of these diagnoses codes found: <ul style="list-style-type: none"><li>• Ischemic heart disease</li><li>• Stroke</li><li>• Peripheral vascular disease</li><li>• Heart failure</li><li>• Carotid artery disease</li><li>• Other CVD diagnosis</li></ul>                                                                                                                                                      |
| Family history of diabetes   | 1. A diagnosis of family history of diabetes, or<br>2. A record in the Observation file denoting family history of diabetes                                                                                                                                                                                                                                                                                             |

---

**Appendix**  
**Use and Impact of Type 2 Diabetes Prevention Interventions**  
**Campione et al.**

**Appendix Table 2.** Description of Social Vulnerability Index and Charlson-Deyo Comorbidity Index

| Variable                                 | Definition                                                                                                                                                                                                                                                                                                                                                                                                                                                                                                                                                                                                                                                                                                                                                                                                                                                                                                                                                                                                                                                                                                                                                                                                                                                                  |
|------------------------------------------|-----------------------------------------------------------------------------------------------------------------------------------------------------------------------------------------------------------------------------------------------------------------------------------------------------------------------------------------------------------------------------------------------------------------------------------------------------------------------------------------------------------------------------------------------------------------------------------------------------------------------------------------------------------------------------------------------------------------------------------------------------------------------------------------------------------------------------------------------------------------------------------------------------------------------------------------------------------------------------------------------------------------------------------------------------------------------------------------------------------------------------------------------------------------------------------------------------------------------------------------------------------------------------|
| Overall Social Vulnerability Index (SVI) | <p>The SVI indicates the relative vulnerability of every U.S. Census tract. Census tracts are subdivisions of counties for which the Census collects statistical data. SVI ranks the tracts on 15 social factors, including unemployment, minority status, and disability, and further groups them into four related themes. Each tract receives a ranking for each Census variable and for each of the four themes, as well as an <b>overall ranking</b>. The SVI uses 15 US census variables to develop four themes: 1.) Socioeconomic Status, 2) Household Composition &amp; Disability, 3) Minority Status &amp; Language, and 4) Housing &amp; Transportation. Each US Census tract is ranked from highest to lowest for each variable and each variable is grouped into 4 themes. A higher percentile rank represents greater vulnerability. 1.0 –most vulnerable, 0.0 least vulnerable. For example, if a census tract has a percentile rank of 0.8 for a variable, it is more vulnerable for that variable than 80% of all tracts against which it is ranked.</p> <p>More detail available at <a href="https://svi.cdc.gov/Documents/Data/2016_SVI_Data/SVI2016Documentation.pdf">https://svi.cdc.gov/Documents/Data/2016_SVI_Data/SVI2016Documentation.pdf</a></p> |
| Charlson-Deyo comorbidity index          | <p>The Charlson-Deyo comorbidity uses a weighted score of 17 comorbid conditions that have been shown to predict mortality. The higher the score, the more comorbidities.</p> <p>Conditions:</p> <ol style="list-style-type: none"> <li>1. Chronic pulmonary disease</li> <li>2. Diabetes without chronic complications*</li> <li>3. Malignancy not skin</li> <li>4. Cerebrovascular disease</li> <li>5. Congestive heart failure</li> <li>6. HIV AIDS</li> <li>7. Mild liver disease</li> <li>8. Myocardial infarction</li> <li>9. Renal disease</li> <li>10. Paraplegia</li> <li>11. Peripheral vascular disease</li> <li>12. Mestatic solid tumor</li> <li>13. Dementia</li> <li>14. Rheumatic disease</li> <li>15. Peptic ulcer</li> <li>16. Moderate sever liver dis</li> <li>17. Diabetes with chronic complications*</li> </ol> <p>* The index was run on dates between first encounter date and end of study date, which is the earliest of type 2 diabetes onset or last encounter date. Therefore,</p>                                                                                                                                                                                                                                                            |

**Appendix**  
**Use and Impact of Type 2 Diabetes Prevention Interventions**  
**Campione et al.**

---

diabetes conditions were not found among our study sample of patients without type 2 diabetes.

This index differs from the Charlson Comorbidity Index because it does not include functional status.

---

**Appendix**  
**Use and Impact of Type 2 Diabetes Prevention Interventions**  
**Campione et al.**

**Appendix Table 3.** Sub-Sample and Timeframe Statistics for the HbA1c and BMI Change Analysis

| Characteristics                                               | No intervention <sup>a</sup> | Metformin | LCP: <sup>c</sup><br>1<br>session | LCP:<br>2–5<br>sessions | LCP:<br>≥6<br>sessions | Bariatric surgery | Metformin and LCP | Bariatric surgery and Metformin |
|---------------------------------------------------------------|------------------------------|-----------|-----------------------------------|-------------------------|------------------------|-------------------|-------------------|---------------------------------|
| Number of patients (full study sample)                        | 63,283                       | 2,681     | 1,482                             | 950                     | 543                    | 250               | 203               | 42                              |
| HbA1c change analysis sub-sample and timeframes               |                              |           |                                   |                         |                        |                   |                   |                                 |
| Number of consistent patients for HbA1c analysis <sup>b</sup> | 8,144                        | 719       | 567                               | 428                     | 287                    | 99                | 103               | 27                              |
| % of full study sample                                        | 13%                          | 27%       | 38%                               | 45%                     | 53%                    | 40%               | 51%               | 64%                             |
| Months in baseline                                            | 26.3                         | 41.4      | 49.2                              | 51.9                    | 62.2                   | 56.8              | 45.0              | 55.0                            |
| Months intervention first half                                | 26.3                         | 9.4       | 0.0                               | 1.1                     | 2.3                    | 1.5               | 16.4              | 11.7                            |
| Months in follow-up                                           | 26.3                         | 27.4      | 42.8                              | 40.1                    | 36.7                   | 29.4              | 29.8              | 27.6                            |
| Total study months (baseline start through follow-up end)     | 78.9                         | 78.2      | 92.0                              | 93.1                    | 101.2                  | 87.7              | 91.2              | 94.3                            |
| LCP number of sessions (if applicable) / Median               | –                            | –         | 1                                 | 3                       | 8                      | 0                 | 2                 | 0                               |
| Intervention duration in months / median                      | –                            | 12.1      | 0                                 | 1.4                     | 2.8                    | 0                 | 32.1              | 18.1                            |
| Number of encounters in the data                              | 45.5                         | 53.5      | 85.3                              | 60.0                    | 59.4                   | 63.7              | 64.5              | 71.8                            |
| BMI change analysis sub-sample and timeframes                 |                              |           |                                   |                         |                        |                   |                   |                                 |
| Number of consistent patients for BMI analysis <sup>b</sup>   | 50,530                       | 1,878     | 1,335                             | 897                     | 530                    | 240               | 176               | 41                              |
| % of full sample                                              | 80%                          | 70%       | 90%                               | 94%                     | 98%                    | 96%               | 87%               | 98%                             |
| Months in baseline                                            | 24.0                         | 38.4      | 44.6                              | 48.3                    | 63.8                   | 51.7              | 43.4              | 47.4                            |
| Months intervention first half                                | 24.0                         | 7.5       | 0.0                               | 1.2                     | 2.7                    | 1.5               | 15.9              | 14.1                            |
| Months in follow-up                                           | 24.0                         | 20.4      | 40.6                              | 36.5                    | 30.1                   | 29.5              | 27.6              | 28.9                            |
| Total study months (baseline start through follow-up end)     | 72.0                         | 66.3      | 85.2                              | 86.0                    | 96.6                   | 82.7              | 86.9              | 90.4                            |
| LCP number of sessions (if applicable) / median               | –                            | –         | 1                                 | 3                       | 8                      | 4                 | 1                 | 4                               |
| Intervention duration in months / median                      | –                            | 10.9      | 0                                 | 1.6                     | 3                      | 0                 | 30.1              | 23.2                            |
| Number of encounters in the data                              | 39.3                         | 47.0      | 85.3                              | 56.5                    | 57.6                   | 56.3              | 59.5              | 70.0                            |

<sup>a</sup>For the No Intervention group, Baseline is a person's first one-third days and Follow-up is the last one-third days in the study.

<sup>b</sup>Patient had at least 1 value before and after intervention.

LCP, lifestyle change program.

**Appendix**  
**Use and Impact of Type 2 Diabetes Prevention Interventions**  
**Campione et al.**

**Appendix Table 4.** LCP Utilization and Type 2 Diabetes (T2DM) Incidence Among Patients Who Were Referred to the National Diabetes Prevention Program

| <b>Use group</b> | <b>Patients, N</b> | <b>T2DM incidence</b> | <b>Mean months at risk*</b> | <b>Used Metformin</b> | <b>Bariatric surgery</b> | <b>LCP duration in months (Min, Max)</b> |
|------------------|--------------------|-----------------------|-----------------------------|-----------------------|--------------------------|------------------------------------------|
| ALL              | 4,753              | 12.9%                 | 35.2                        | 2.0%                  | 0.5%                     | 0.7 (0–42.1)                             |
| 10+ Sessions**   | 129                | 5.4%                  | 26.2                        | 6.2%                  | 2.3%                     | 12.3 (2.3–42.1)                          |
| 9 Sessions       | 109                | 11.0%                 | 30.8                        | 5.5%                  | 0.9%                     | 3.2 (1.7–13.6)                           |
| 8 Sessions       | 112                | 7.1%                  | 35.5                        | 5.4%                  | 1.8%                     | 2.9 (1.4–15.7)                           |
| 7 Sessions       | 97                 | 7.2%                  | 34.2                        | 4.1%                  | 1.0%                     | 3.2 (1.6–13.9)                           |
| 6 Sessions       | 95                 | 2.1%                  | 37.2                        | 5.3%                  | 3.2%                     | 3.1 (1.2–12.6)                           |
| 5 Sessions       | 75                 | 8.0%                  | 33.6                        | 2.7%                  | 2.7%                     | 2.4 (0.9–12.0)                           |
| 4 Sessions       | 89                 | 10.1%                 | 37.0                        | 6.7%                  | 6.7%                     | 2.5 (0.6–11.1)                           |
| 3 Sessions       | 106                | 15.1%                 | 38.0                        | 7.5%                  | 1.9%                     | 1.5 (0.2–11.5)                           |
| 2 Sessions       | 153                | 15.0%                 | 37.0                        | 11.8%                 | 2.0%                     | 0.8 (0.1–6.7)                            |
| 1 Session        | 371                | 11.6%                 | 42.3                        | 8.6%                  | 0.8%                     | 0                                        |
| Total attendees  | 1,336              | 10.0%                 | 36.5                        | 7.1%                  | 1.9%                     | 2.7 (0–42.1)                             |
| 0 Sessions       | 3,417              | 14.0%                 | 34.8                        | 4.5%                  | 0.0%                     | 0                                        |

\*Months at risk for T2DM incidence is defined as intervention start date through study end (Follow-up). For the group with 0 Sessions, the intervention start date is the middle of a patient’s time in the study.

\*\*For the 10+ Session group, the median = 19 Sessions and the mean = 28 Sessions.

LCP, lifestyle change program.
